# Supplementary material
Source: PubMed Central journal article supplement (PMC5832504)
Supplement: NIHMS885161-supplement-supplement_1.pdf [file NIHMS885161-supplement-supplement_1.pdf]

## Supplementary Figure 1. Consort Diagram of ID vs PO vs ID+PO BCG Comparative Trial

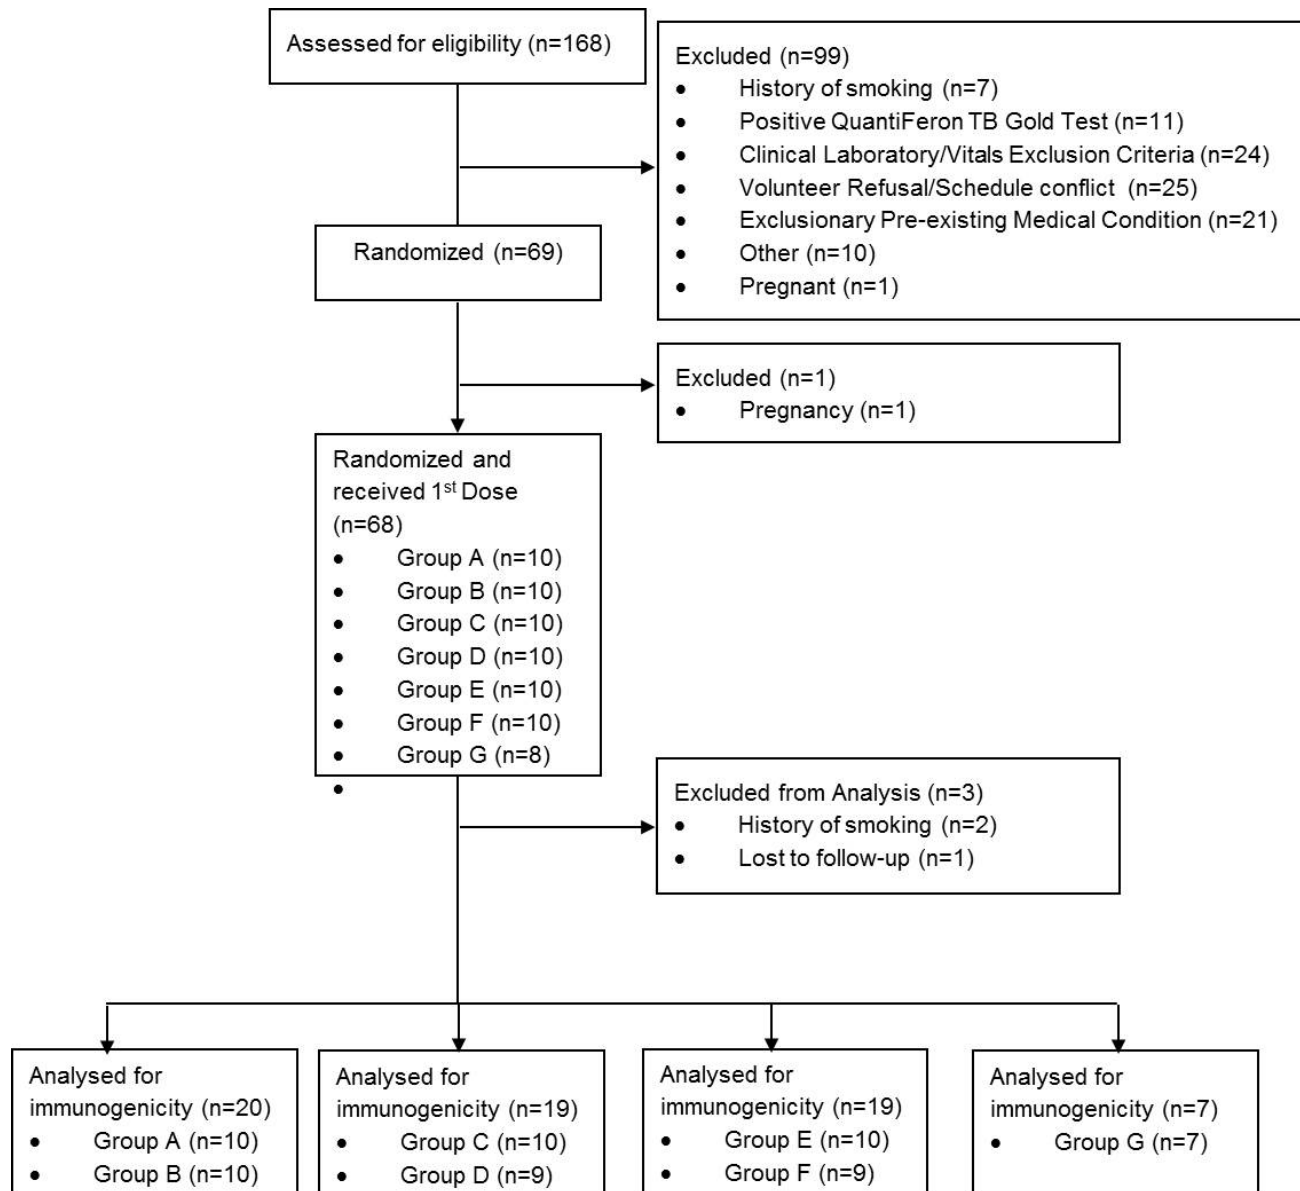

### Supplementary Figure 2. Lymphoproliferative and IFN- $\gamma$ ELISPOT Responses in all Subjects

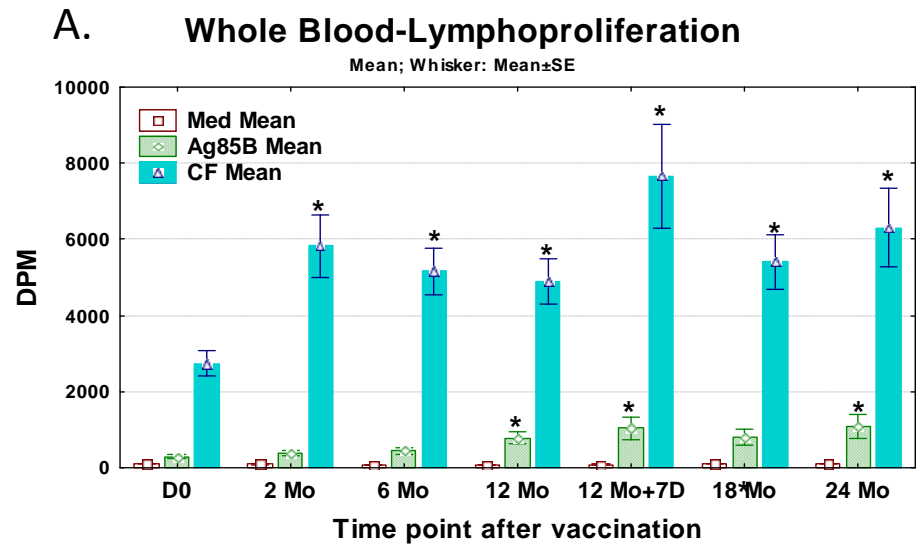

\*  $p < 0.05$  by Mann-Whitney U test comparing post-vaccination time points with D0

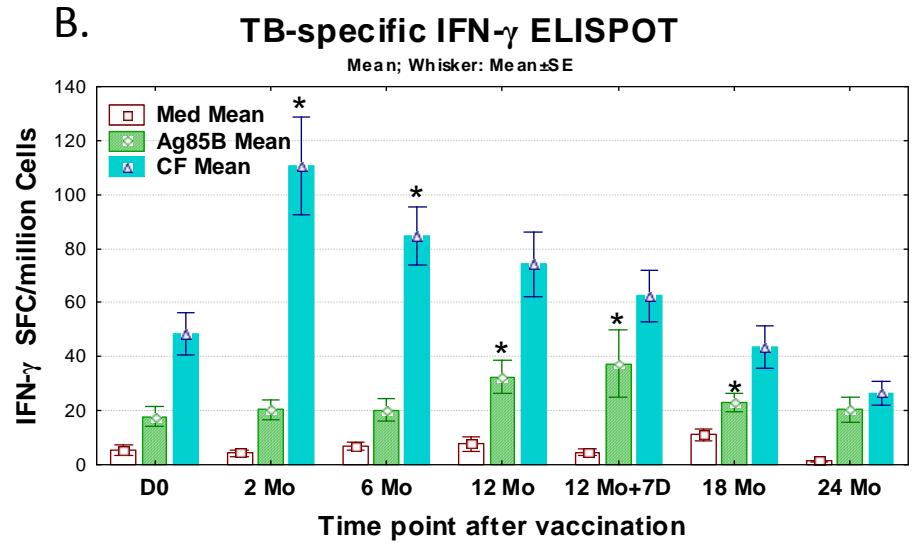

\*  $p < 0.05$  by Wilcoxon Matched Pairs test comparing post-vaccination time points with D0

## Supplementary Figure Legend

**Supplementary Figure 1. Consort Diagram of main ID vs PO vs ID+PO comparative trial.**

**Supplementary Figure 2. Lymphoproliferative and IFN- $\gamma$  ELISPOT responses in all subjects.** The lymphoproliferative (A.) and IFN- $\gamma$  ELISPOT (B.) assays were completed as in Figures 2 and 3, respectively. Mean values  $\pm$  SE are shown for each time point. \* $p < 0.05$ , \*\* $p < 0.01$  by Wilcoxon matched pairs testing compared with pre-vaccination responses.
